# Supplementary material for: Essential roles of autophagy in metabolic regulation in endosperm development during rice seed maturation
Source: PubMed Central journal article supplement (PMC6898296; doi:10.1038/s41598-019-54361-1), 2019-12-06
Supplement: 41598_2019_54361_MOESM1_ESM.pdf [file 41598_2019_54361_MOESM1_ESM.pdf]

## **Essential roles of autophagy in metabolic regulation in endosperm development during rice seed maturation**

Yuri Sera<sup>1,12</sup>, Shigeru Hanamata<sup>1,2,9,12</sup>, Shingo Sakamoto<sup>3</sup>, Seijiro Ono<sup>4,11</sup>, Kentaro Kaneko<sup>2</sup>, Yuudai Mitsui<sup>2</sup>, Tomoko Koyano<sup>1</sup>, Naoko Fujita<sup>5</sup>, Ai Sasou<sup>6,10</sup>, Takehiro Masumura<sup>6</sup>, Hikaru Saji<sup>7</sup>, Ken-Ichi Nonomura<sup>4</sup>, Nobutaka Mitsuda<sup>3</sup>, Toshiaki Mitsui<sup>2</sup>, Takamitsu Kurusu<sup>1,8,9\*</sup>, Kazuyuki Kuchitsu<sup>1,9\*</sup>

<sup>1</sup>Department of Applied Biological Science, Tokyo University of Science, 2641 Yamazaki, Noda, Chiba, 278-8510, Japan, <sup>2</sup>Graduate School of Science and Technology, Niigata University, 2-8050 Ikarashi, Niigata, 950-2181, Japan, <sup>3</sup>Bioproduction Research Institute, National Institute of Advanced Industrial Science and Technology (AIST), Tsukuba, Ibaraki, 305-8566, Japan, <sup>4</sup>Plant Cytogenetics Laboratory, National Institute of Genetics, 1111 Yata, Mishima, Shizuoka, 411-8540, Japan, <sup>5</sup>Department of Biological Production, Akita Prefectural University, 241-438 Shimoshinjo Nakano Kaidobata-Nishi, Akita City, Akita, 010-0195, Japan, <sup>6</sup>Laboratory of Genetic Engineering, Graduate School of Life and Environmental Sciences, Kyoto Prefectural University, Shimogamo, Kyoto, 606-8522, Japan, <sup>7</sup>Center for Environmental Biology and Ecosystem Studies, National Institute for Environmental Studies (NIES), Onogawa, Tsukuba, Ibaraki, 305-8506, Japan, <sup>8</sup>Department of Mechanical and Electrical Engineering, Suwa University of Science, 5000-1 Toyohira, Chino, Nagano, 391-0292, Japan, <sup>9</sup>Imaging Frontier Center, Tokyo University of Science, 2641 Yamazaki, Noda, Chiba 278-8510, Japan, <sup>10</sup>Division of Mucosal Immunology, Institute of Medical Science, The University of Tokyo, 4-6-1 Shirokanedai, Minato-ku, Tokyo, 108-8639 Japan, <sup>11</sup>Department of Developmental Biology, Institute for Plant Sciences and Microbiology, University of Hamburg, 22609 Hamburg, Germany, <sup>12</sup>These authors contributed equally to this work: Yuri Sera and Shigeru Hanamata.

\*Co-corresponding authors:

Kazuyuki Kuchitsu, Department of Applied Biological Science, Tokyo University of Science, 2641 Yamazaki, Noda, Chiba, 278-8510, Japan, E-mail: kuchitsu@rs.noda.tus.ac.jp, Tel.: +81-4-7122-9404, Fax: +81-4-7123-9767

Takamitsu Kurusu, Department of Mechanical and Electrical Engineering, Suwa University of Science, 5000-1 Toyohira, Chino, Nagano, 391-0292, Japan, e-mail: kurusu@rs.sus.ac.jp, Tel.: +81-266-73-9826

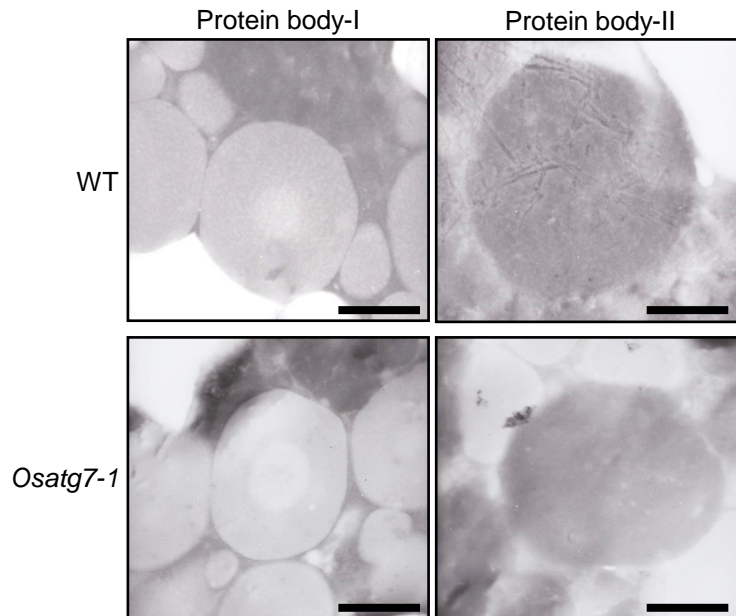

**Figure S1.** Effects of autophagy disruption on protein body structure in the endosperm of rice. Ultrastructure of protein body (PB)-I and II in the starch endosperm of WT (Upper) and the *Osatg7-1* mutant (Lower) at the seed developing stage. Scale bar: 1  $\mu$ m. Similar results were obtained from 5 independent samples. No significant differences were observed in the structures of protein bodies between WT and the *Osatg7-1* mutant.

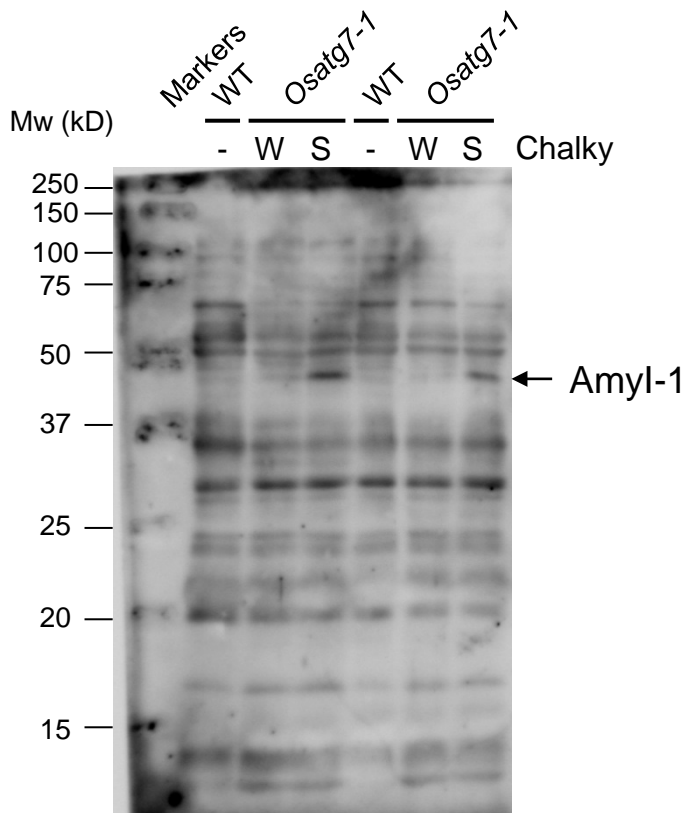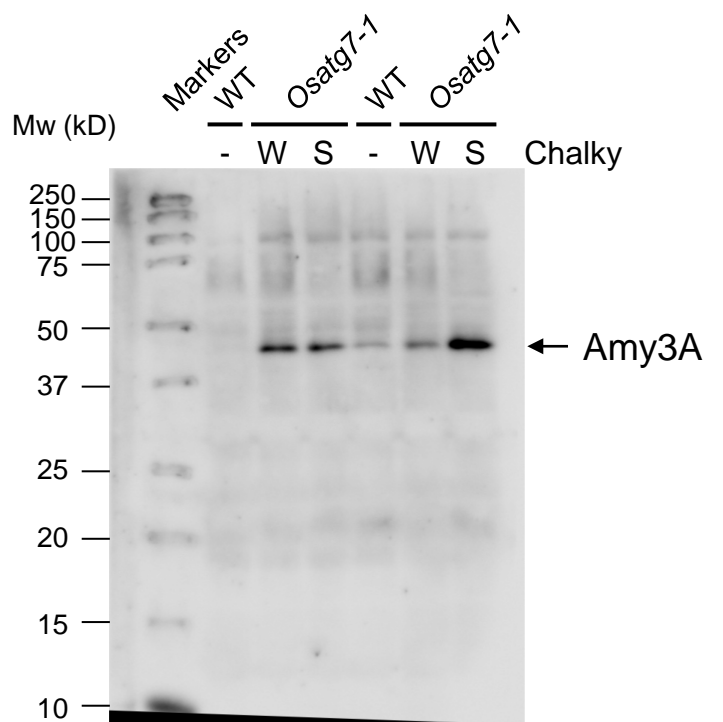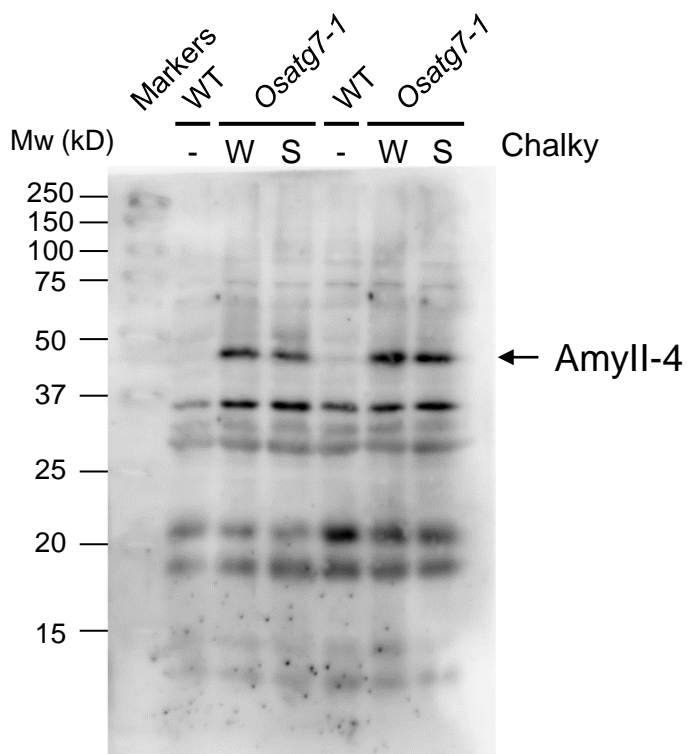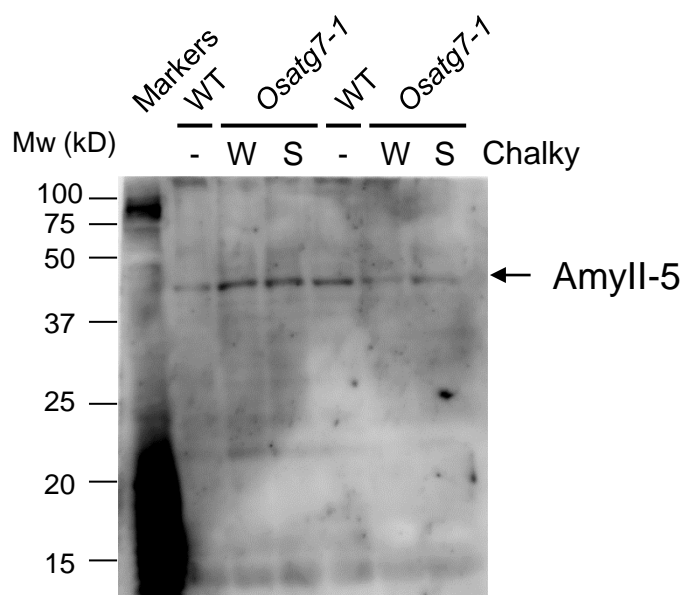

**Figure S2.** The full-length blots shown in Figures 4B.

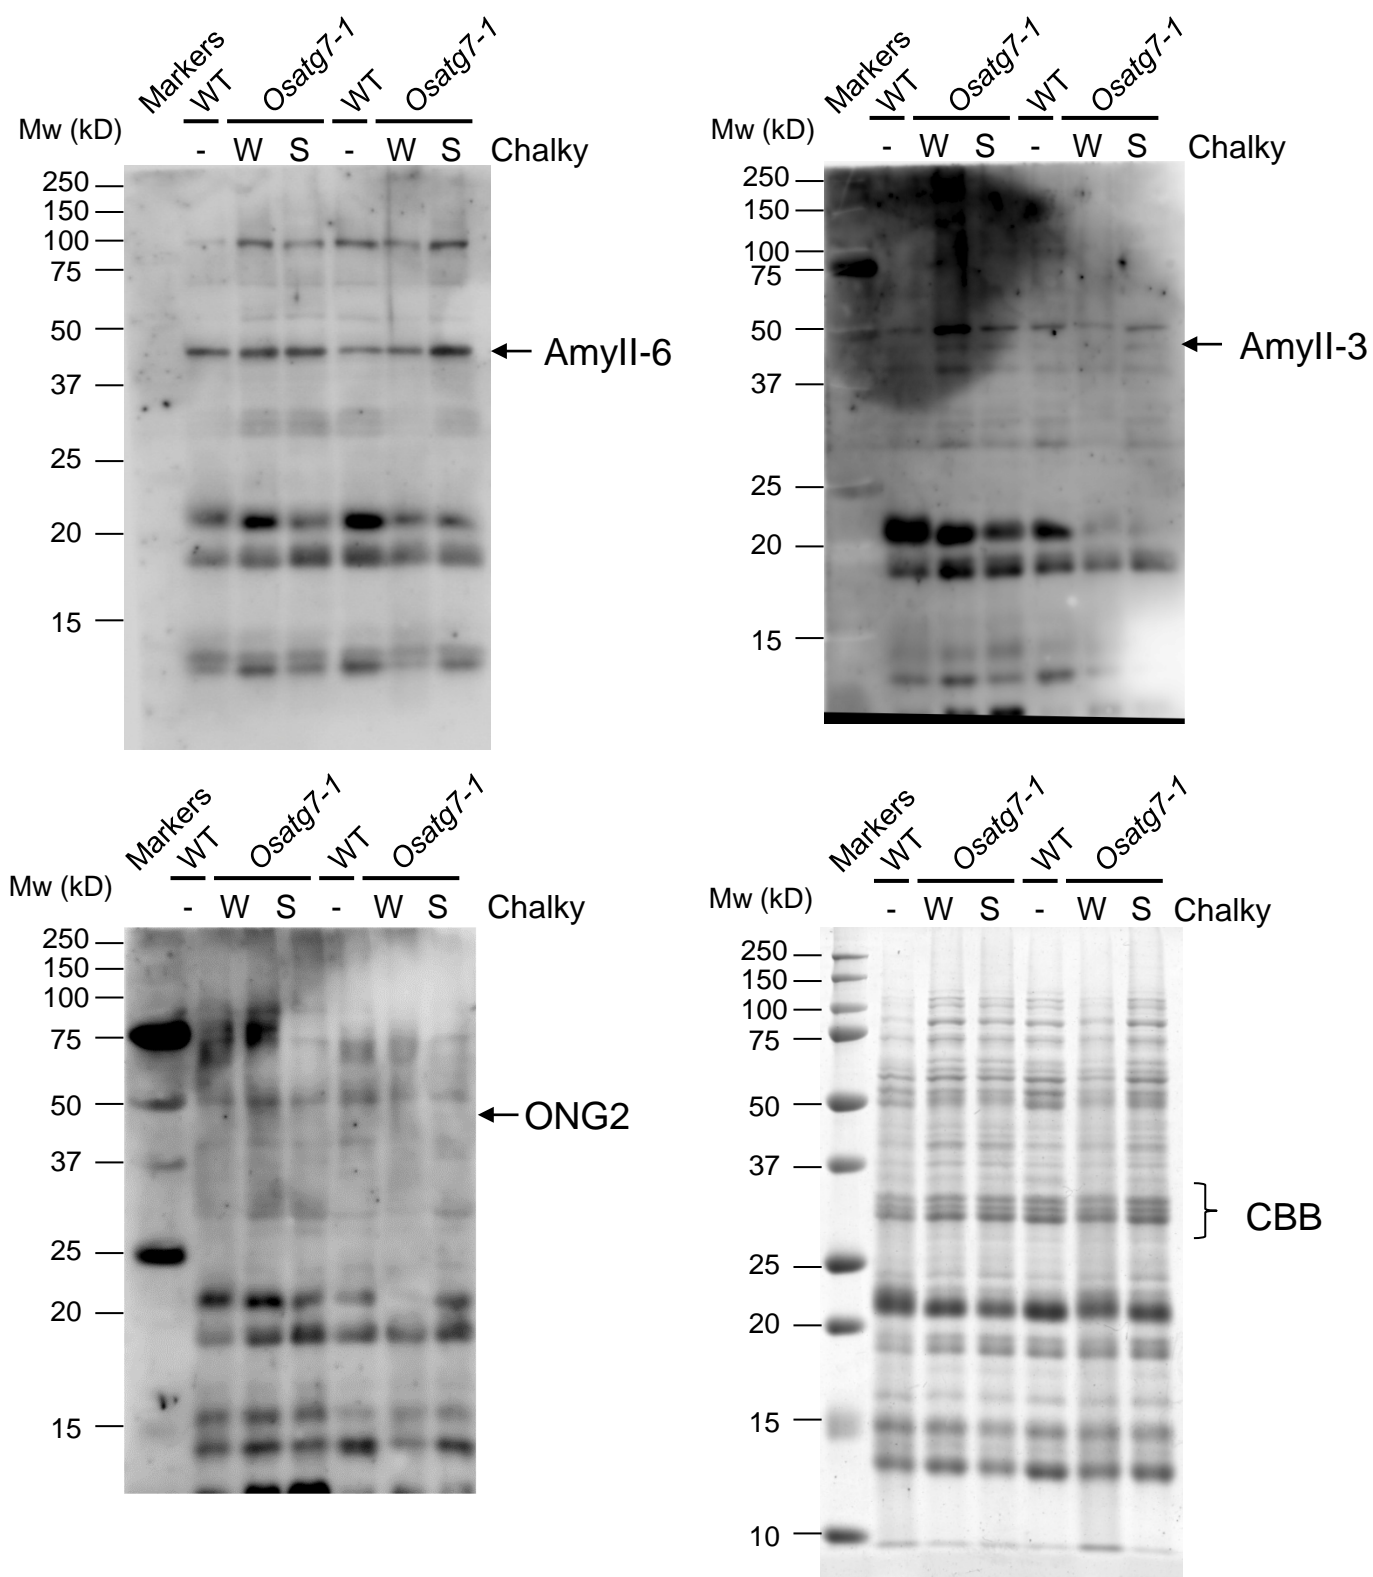

**Figure S3.** The full-length blots shown in Figures 4B.
